# Supplementary material
Source: PubMed Central journal article supplement (PMC6581167)
Supplement: AEM.03030-18-s0001.pdf [file AEM.03030-18-s0001.pdf]

**Supplementary data**  
**Genomic Comparison Reveals Natural Occurrence of Clinically  
Relevant Multi-Drug Resistant Extended-Spectrum  $\beta$ -lactamase  
producing *Escherichia coli***

**Lin Teng<sup>a,b</sup>, Shinyoung Lee<sup>a,b</sup>, Amber Ginn<sup>a,b</sup>, Sarah M. Markland<sup>a,b</sup>, Raies Mir<sup>a,b</sup>, Nicolas  
DiLorenzo<sup>c</sup>, Christina Boucher<sup>d</sup>, Mattia Prospero<sup>e</sup>, Judith Johnson<sup>a</sup>, J. Glenn Morris, Jr.<sup>a,f</sup>,  
and KwangCheol Casey Jeong<sup>a,b#</sup>**

<sup>a</sup>Emerging Pathogens Institute, University of Florida, Gainesville, Florida, USA

<sup>b</sup>Department of Animal Sciences, Institute of Food and Agricultural Sciences, University of  
Florida, Gainesville, Florida, USA

<sup>c</sup>North Florida Research and Education Center, University of Florida, Marianna, Florida, USA

<sup>d</sup>Department of Computer Science, College of Engineering, University of Florida, Gainesville,  
Florida, USA

<sup>e</sup>Department of Epidemiology, College of Medicine, University of Florida, Gainesville, Florida,  
USA

<sup>f</sup>Department of Medicine, College of Medicine, University of Florida, Gainesville, Florida, USA

**Running Title: Natural occurrence of ESBL *E.coli***

#Address correspondence to K. Casey Jeong, [kcjeong@ufl.edu](mailto:kcjeong@ufl.edu)

Table S1. Genome sequencing information of strains used in this study

| Strain Name | Accession number             | Description of Isolation Source | Genome Size (bp) | Contig number | N50     | References |
|-------------|------------------------------|---------------------------------|------------------|---------------|---------|------------|
| JEONG5084   | <a href="#">NSED00000000</a> | Feces of beef cattle from BRU   | 5,169,803        | 404           | 42,853  | This Study |
| JEONG5114   | <a href="#">NSEE00000000</a> | Feces of beef cattle from BRU   | 5,156,802        | 468           | 37,061  | This Study |
| JEONG5120   | <a href="#">NSEF00000000</a> | Feces of beef cattle from BRU   | 5,083,504        | 681           | 18,827  | This Study |
| JEONG5232   | <a href="#">NSEG00000000</a> | Feces of beef cattle from BRU   | 5,119,940        | 591           | 24,586  | This Study |
| JEONG5250   | <a href="#">NSEH00000000</a> | Feces of beef cattle from BRU   | 5,134,425        | 576           | 30,286  | This Study |
| JEONG5298   | <a href="#">NSEI00000000</a> | Feces of beef cattle from BRU   | 5,206,665        | 440           | 45,176  | This Study |
| JEONG5413   | <a href="#">NSEJ00000000</a> | Feces of beef cattle from BRU   | 4,821,355        | 247           | 85,136  | This Study |
| JEONG5446   | <a href="#">NSEK00000000</a> | Feces of beef cattle from BRU   | 5,607,261        | 417           | 62,828  | This Study |
| JEONG5453   | <a href="#">NSEL00000000</a> | Feces of beef cattle from BRU   | 5,214,502        | 364           | 58,096  | This Study |
| JEONG5507   | <a href="#">NSEM00000000</a> | Feces of beef cattle from BRU   | 5,189,762        | 458           | 42,281  | This Study |
| JEONG5511   | <a href="#">NSEN00000000</a> | Feces of beef cattle from BRU   | 5,132,836        | 555           | 27,714  | This Study |
| JEONG5617   | <a href="#">NSEO00000000</a> | Feces of beef cattle from BRU   | 4,797,640        | 172           | 90,738  | This Study |
| JEONG5650   | <a href="#">NSEP00000000</a> | Feces of beef cattle from BRU   | 5,081,214        | 437           | 48,231  | This Study |
| JEONG5766   | <a href="#">NSEQ00000000</a> | Feces of beef cattle from BRU   | 4,806,311        | 103           | 213,321 | This Study |
| JEONG5776   | <a href="#">NSER00000000</a> | Feces of beef cattle from BRU   | 5,300,733        | 133           | 155,776 | This Study |
| JEONG9566   | <a href="#">PKKV00000000</a> | Feces of beef cattle from NFREC | 4,660,015        | 213           | 69,758  | This Study |
| JEONG9567   | <a href="#">PKKU00000000</a> | Feces of beef cattle from NFREC | 4,812,461        | 130           | 110,948 | This Study |
| JEONG9592   | <a href="#">PKKW00000000</a> | Feces of beef cattle from NFREC | 4,622,443        | 59            | 282,672 | This Study |
| JEONG9593   | <a href="#">QDJW00000000</a> | Feces of beef cattle from NFREC | 4,623,655        | 56            | 240,083 | This Study |
| JEONG9594   | <a href="#">QDJX00000000</a> | Feces of beef cattle from NFREC | 4,615,016        | 119           | 81,805  | This Study |
| JEONG9596   | <a href="#">QDJY00000000</a> | Feces of beef cattle from NFREC | 4,604,110        | 170           | 64,951  | This Study |
| JEONG9597   | <a href="#">QDKF00000000</a> | Feces of beef cattle from NFREC | 4,612,956        | 147           | 67,266  | This Study |
| JEONG9598   | <a href="#">PKKX00000000</a> | Feces of beef cattle from NFREC | 4,919,012        | 141           | 86,030  | This Study |
| JEONG9599   | <a href="#">QDJZ00000000</a> | Feces of beef cattle from NFREC | 4,931,346        | 96            | 111,796 | This Study |
| JEONG9600   | <a href="#">QDKA00000000</a> | Feces of beef cattle from NFREC | 4,930,684        | 110           | 122,732 | This Study |
| JEONG9601   | <a href="#">QDKB00000000</a> | Feces of beef cattle from NFREC | 4,912,261        | 221           | 49,238  | This Study |
| JEONG9602   | <a href="#">QDKC00000000</a> | Feces of beef cattle from NFREC | 4,914,792        | 204           | 56,569  | This Study |
| JEONG9603   | <a href="#">QDKD00000000</a> | Feces of beef cattle from NFREC | 4,905,796        | 246           | 52,734  | This Study |
| JEONG9615   | <a href="#">QDKE00000000</a> | Feces of beef cattle from NFREC | 4,629,950        | 309           | 35,221  | This Study |
| KCJ9488     | <a href="#">QGNB00000000</a> | Feces of beef cattle from BRU   | 4,850,507        | 113           | 179,208 | This Study |
| KCJ9489     | <a href="#">QGNC00000000</a> | Feces of beef cattle from BRU   | 4,852,703        | 106           | 288,589 | This Study |
| KCJ9491     | <a href="#">QGND00000000</a> | Feces of beef cattle from BRU   | 4,847,940        | 120           | 211,772 | This Study |
| KCJ9492     | <a href="#">QGNE00000000</a> | Feces of beef cattle from BRU   | 4,851,025        | 109           | 193,455 | This Study |
| KCJ9493     | <a href="#">QGNF00000000</a> | Feces of beef cattle from BRU   | 4,824,226        | 299           | 39,007  | This Study |
| KCJ9499     | <a href="#">QGNS00000000</a> | Feces of beef cattle from BRU   | 5,173,529        | 154           | 89,182  | This Study |
| KCJ9511     | <a href="#">QNGG00000000</a> | Feces of beef cattle from BRU   | 5,226,877        | 194           | 83,425  | This Study |

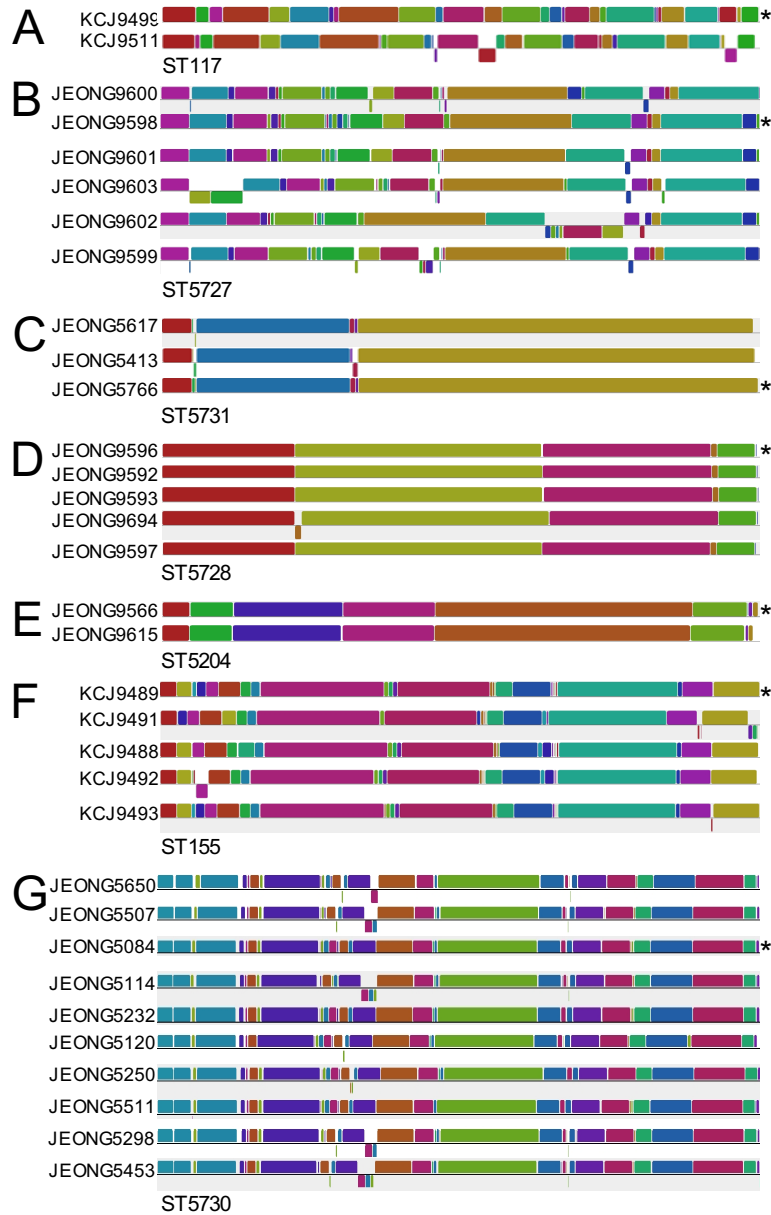

**Fig S1. Whole genome alignment of isolates in the same phylogenetic clade.** Whole genome sequences of strains within the same clade/ST were aligned using progressiveMauve with default setting. A strain with an asterisk (\*) in each sub-figure (A-G) was the reference genome in each alignment. Blocks with the same color indicate the homologous regions among/between strains in each sub-figure. An upper block indicates that the genomic region is in the same direction as the homologous region in the reference genome, while a bottom block represents an inverted genomic region.

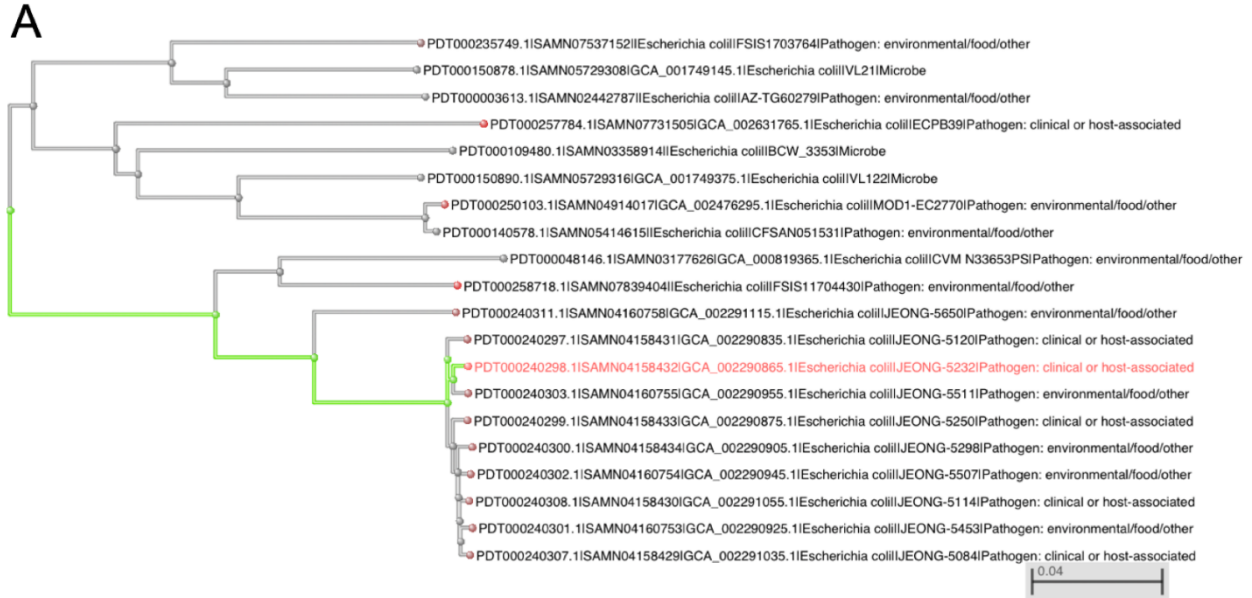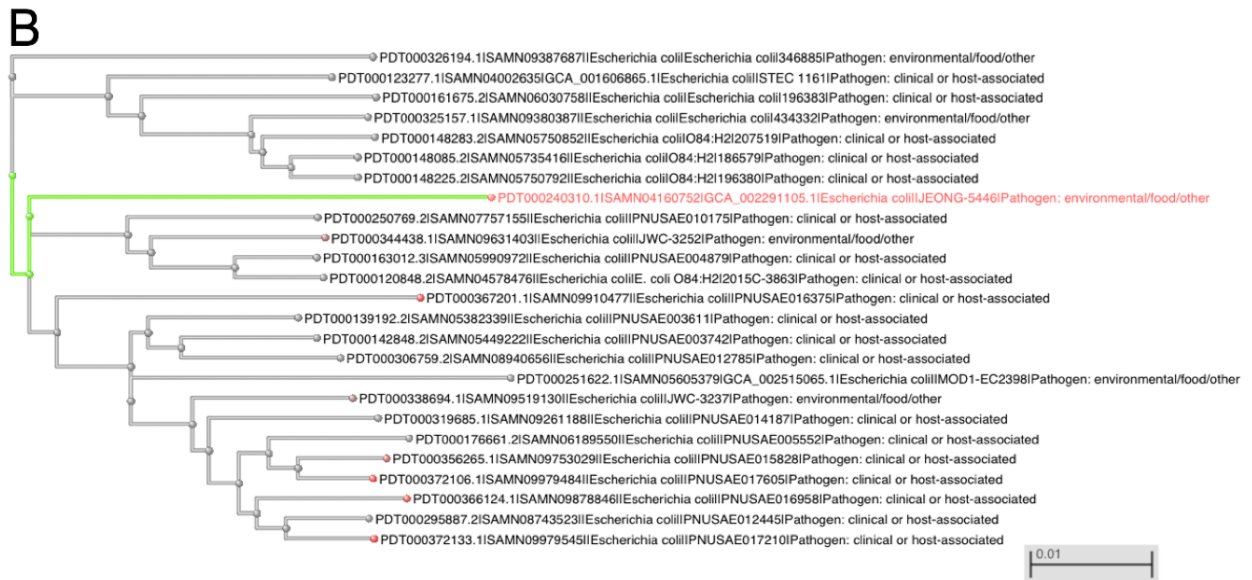

C

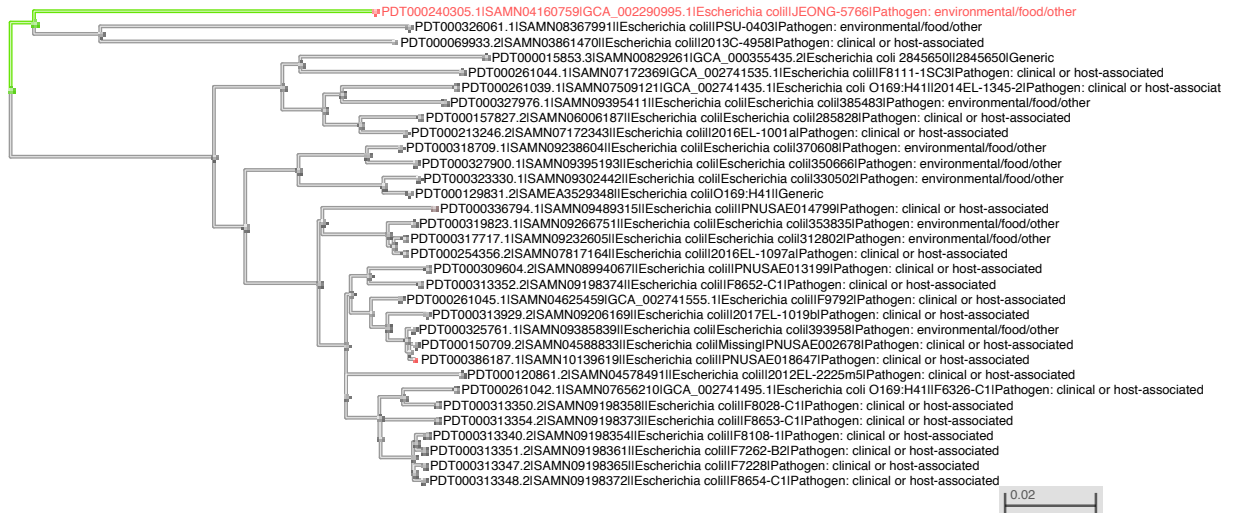

D

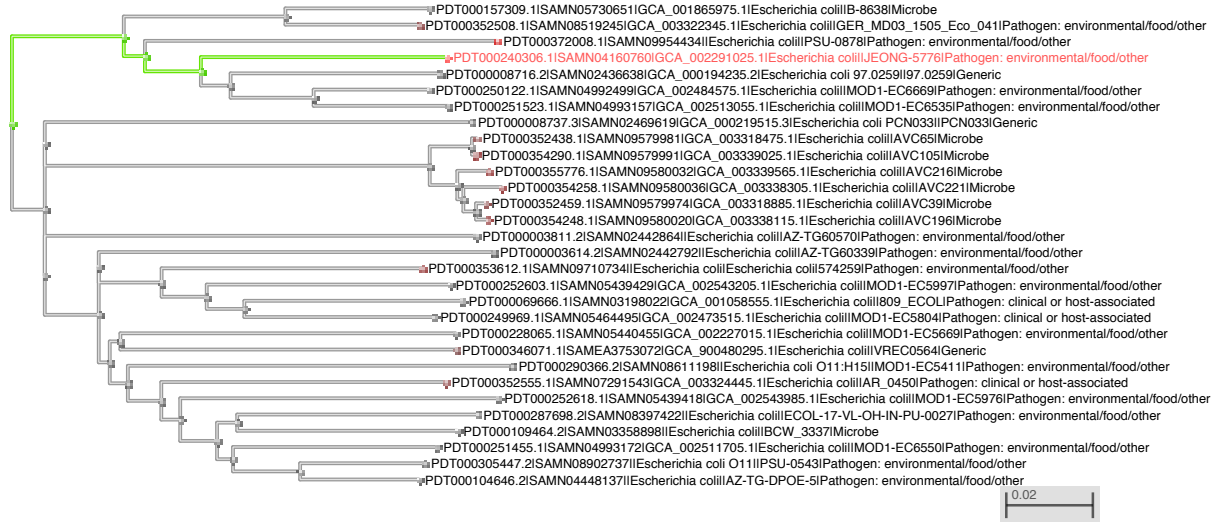

E

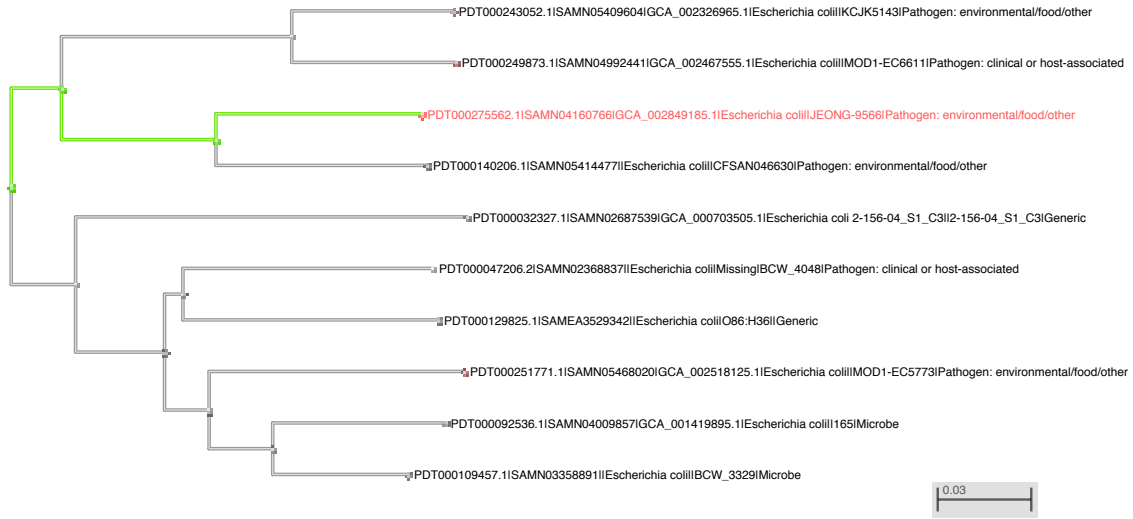

F

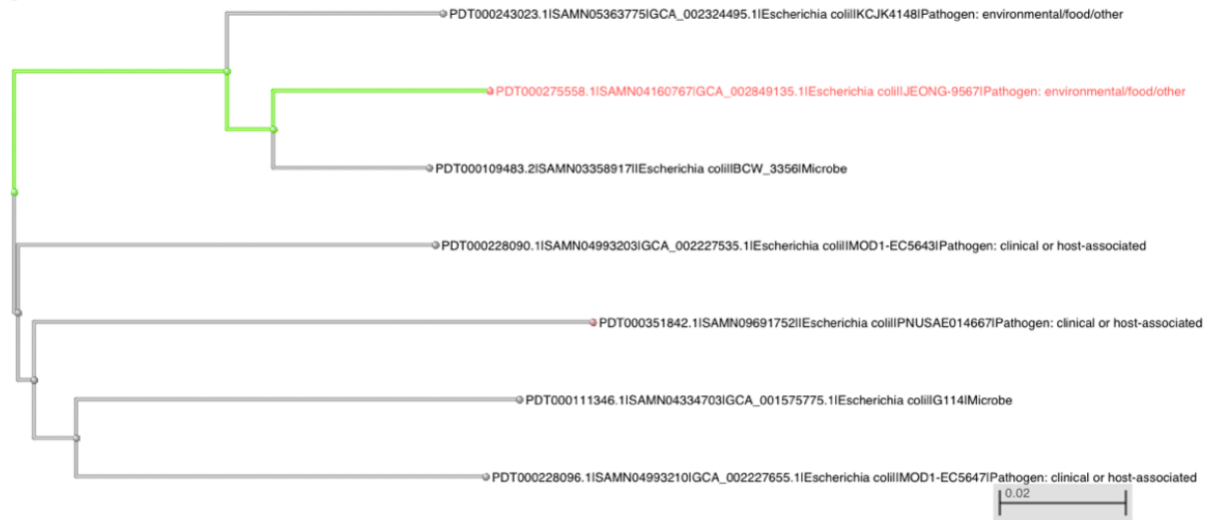

G

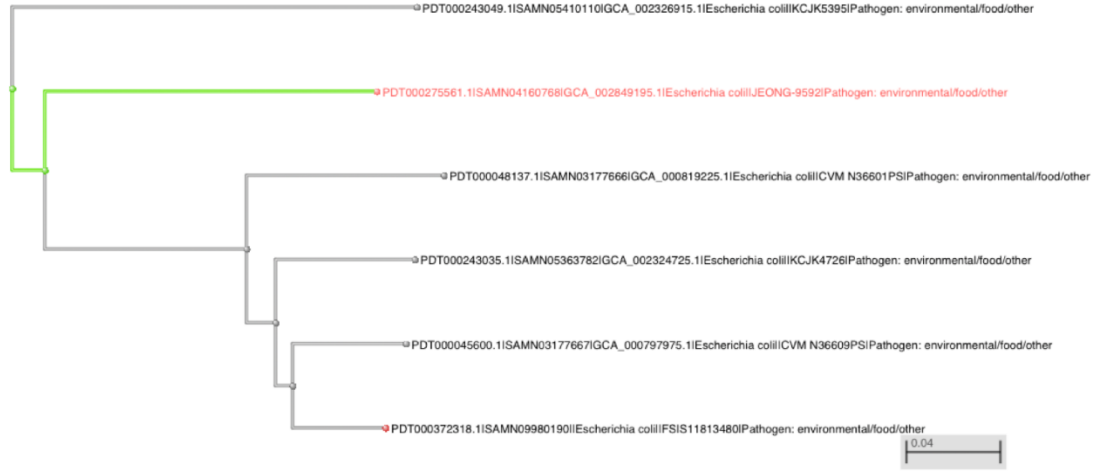

H

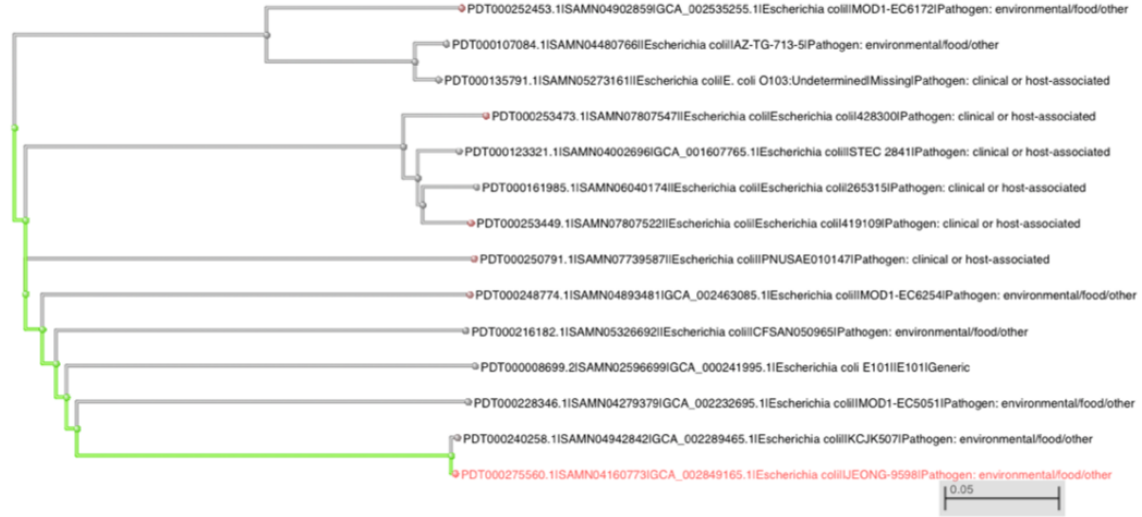

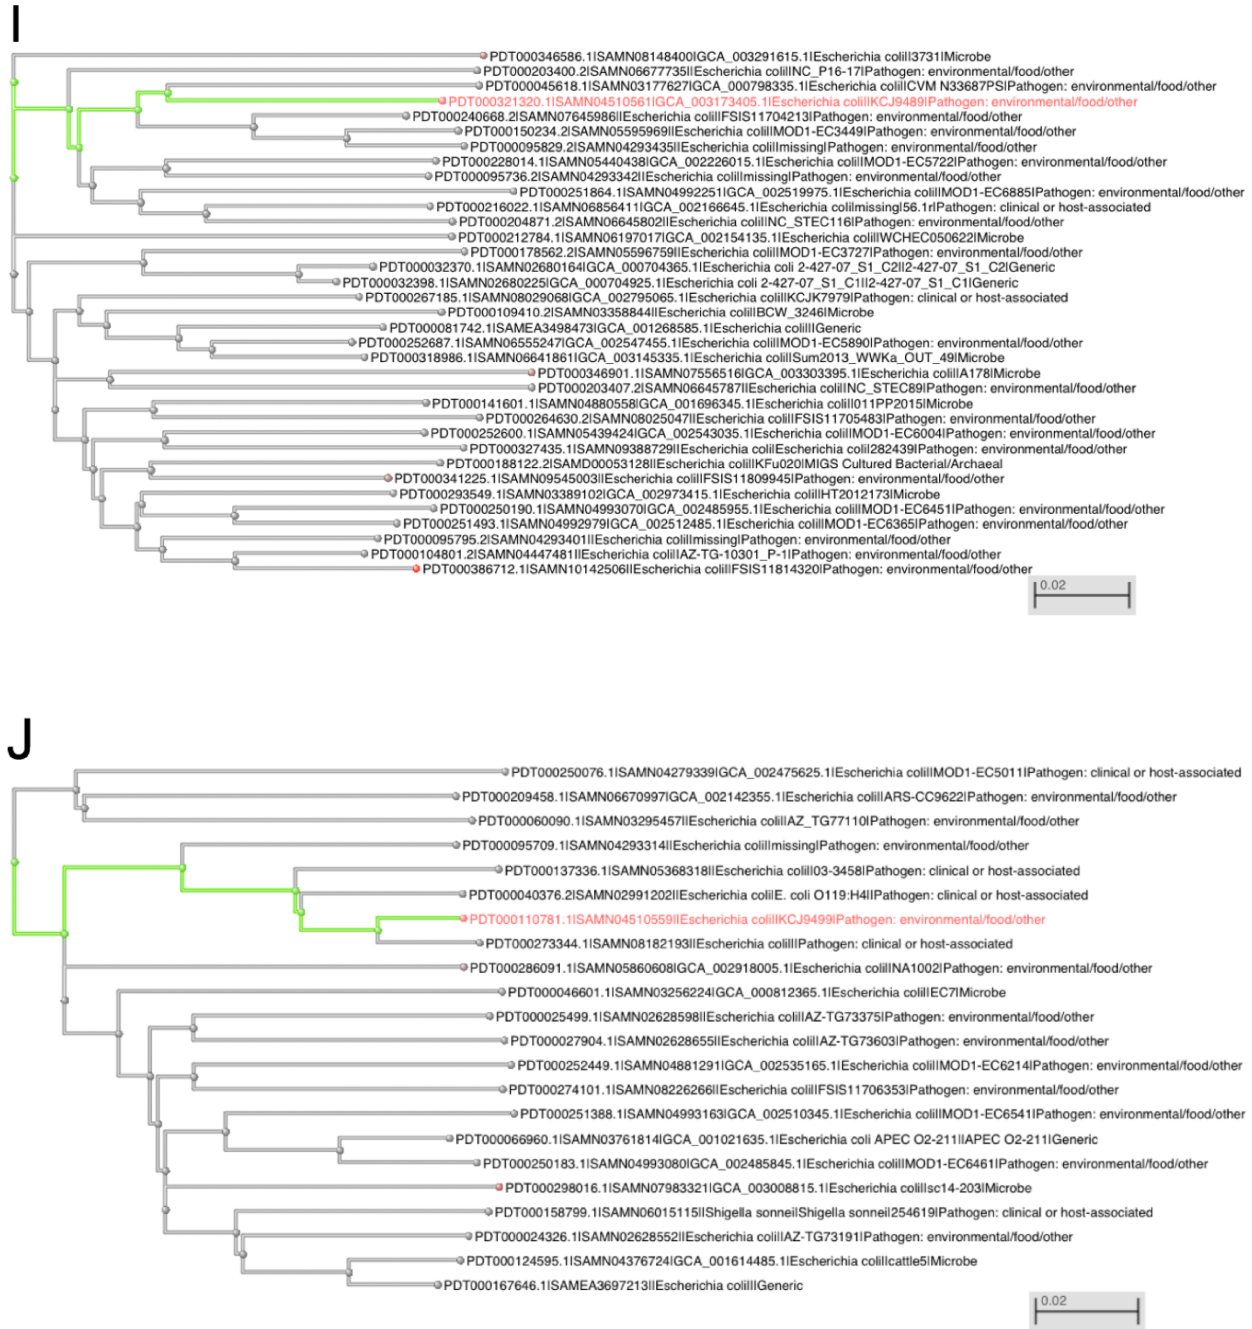

**Fig S2. Phylogenetic trees of multidrug resistant *E. coli* isolates with other global lineages.**

Phylogenetic trees analyses was conducted using the GenomeTrakr database to identify clonal variants of the representative MDR *E. coli* isolates selected from the clades in Figure 2. Strains in red color are A) JEONG5232 (ST5730), B) JEONG5446 (ST306), C) JEONG5766 (ST5731), D) JEONG5776 (ST973), E) JEONG9566 (ST5204), F) JEONG9567 (ST10), G) JEONG9592



(ST5728), H) JEONG9598 (ST5727), I) KCJ9489 (ST155), and J) KCJ9499 (ST117).

Phylogenetic trees were generated using the Genome Workbench (1). The scale bars represent the mean numbers of nucleotide substitution per site.

## Supplementary Reference

1. NCBI. 2017. Database Resources of the National Center for Biotechnology Information. *Nucleic Acids Res* 45:D12-D17.
